# Supplementary material for: The Disproportionate Burden: Health and Economic Outcomes of COVID-19 for Native American Communities
Source: Research Square preprint supplement (doi:10.21203/rs.3.rs-9452333/v1), 2026-05-27
Supplement: Supplementary file 1 [file b1344b63d6a840f8d652e90d.docx]

**Appendices:**

**Appendix A: AIAN Identification**

| **Table A.1: COVID-19 Related Health Outcomes for non-mixed-race AIAN** | | | | |
| --- | --- | --- | --- | --- |
| Outcome Variable: | **Positive Test** | **Long-COVID** | **Full Vaxx** | **Test COVID** | |
|  | (1) | (2) | (3) | (4) | |
| Rural | -0.083 | **0.252**** | **-0.199***** | -0.058 | |
|  | (0.054) | (0.089) | (0.064) | (0.073) | |
| Obese (BMI>=30) | 0.055 | **0.198***** | -0.039 | -0.014 | |
|  | (0.041) | (0.054) | (0.024) | (0.044) | |
| Poor (<200% FPL) | 0.013 | **0.106+** | **-0.142**** | **-0.097*** | |
|  | (0.039) | (0.057) | (0.035) | (0.040) | |
| Visited ER Past Year | 0.053 | -0.023 | 0.025 | 0.006 | |
|  | (0.052) | (0.069) | (0.036) | (0.043) | |
| Covered by Medicare | **-0.198***** | -0.081 | **0.120***** | -0.070 | |
|  | (0.043) | (0.077) | (0.030) | (0.066) | |
|  |  |  |  |  | |
| Constant | 0.333*** | 0.245*** | 0.876*** | 785*** | |
|  | (0.055) | (0.070) | (0.033) | (0.049) | |
| Outcome Mean | 0.472 | 0.403 | 0.827 | 0.75 | |
| Outcome Standard Deviation | 0.499 | 0.491 | 0.378 | 0.433 | |
| r2 | 0.089 | 0.134 | 0.120 | 0.057 | |
| N_pop | 2,299,614 | 1,049,416 | 1,914,626 | 1,828,159 | |
| N | 1,504 | 621 | 1,197 | 1,247 | |
| Source: California Health Interview Survey (CHIS) Public Use Files (2021-2023). | | | | |
| Notes: All columns are AIAN respondents excluding not directly identified as AIAN by indicating a mixed race but having IHS coverage. Columns (1)-(4) ask respondents if they tested positive for COVID-19, report long-COVID symptoms, are fully vaccinated from COVID-19, and if tested for COVID-19 in the past year. Each model controls for respondent demographics of gender, age, and marital status and the PUF models include year fixed effects. Symbols denote significance 0.5% (***), 1% (**), 5% (*), and 10% (+) levels. | | | | |
|  | |
|  | |
|  | |
|  | |
|  | |

| **Table A.2: Economic Hardship Outcomes for non-IHS AIAN** | | | |
| --- | --- | --- | --- |
| **Panel A:** |  |  |  |
| Outcome Variable: | **Food Insecurity w/ Hunger** | | |
|  | (1) | (2) | (3) |
| COVID-19 Vaccination Status | **-0.078+** | -- | -- |
|  | (0.045) | -- | -- |
| COVID-19 Positive Test Results | -- | 0.010 | -- |
|  | -- | (0.020) | -- |
| Self-Report Long-COVID Symptoms | -- | -- | **0.101*** |
|  | -- | -- | (0.039) |
| Outcome Mean | 0.094 | 0.075 | 0.085 |
| Outcome Standard Deviation | 0.292 | 0.264 | 0.28 |
| r2 | 0.028 | 0.015 | 0.041 |
| N_pop | 1,641,965 | 1,998,516 | 947,037 |
| N | 941 | 1,219 | 537 |
| **Panel B:** |  |  |  |
| Outcome Variable: | **Job Loss** | | |
|  | (1) | (2) | (3) |
| COVID-19 Vaccination Status | -0.091 | -- | -- |
|  | (0.057) | -- | -- |
| COVID-19 Positive Test Results | -- | **-0.082*** | -- |
|  | -- | (0.034) | -- |
| Self-Report Long-COVID Symptoms | -- | -- | 0.033 |
|  | -- | -- | (0.048) |
| Outcome Mean | 0.109 | 0.149 | 0.072 |
| Outcome Standard Deviation | 0.312 | 0.357 | 0.258 |
| r2 | 0.018 | 0.026 | 0.037 |
| N_pop | 848,798 | 1,205,349 | 470,723 |
| N | 472 | 750 | 255 |
|  |  |  |  |
|  |  |  |  |
|  |  |  |  |
|  |  |  |  |
|  |  |  |  |
|  |  |  |  |
|  |  |  |  |
|  |  |  |  |
|  |  |  |  |
| **Panel C:** |  |  |  |
| Outcome Variable: | **Reduced Income/Hours** | | |
|  | (1) | (2) | (3) |
| COVID-19 Vaccination Status | **-0.226**** | -- | -- |
|  | (0.082) | -- | -- |
| COVID-19 Positive Test Results | -- | 0.030 | -- |
|  | -- | (0.044) | -- |
| Self-Report Long-COVID Symptoms | -- | -- | -0.132 |
|  | -- | -- | (0.082) |
| Outcome Mean | 0.224 | 0.204 | 0.227 |
| Outcome Standard Deviation | 0.418 | 0.403 | 0.419 |
| r2 | 0.061 | 0.028 | 0.037 |
| N_pop | 848,798 | 1,205,349 | 470,723 |
| N | 472 | 750 | 255 |
| Source: California Health Interview Survey (CHIS) Public Use Files (2021-2023). | | | |
| Notes: All columns are AIAN respondents excluding not directly identified as AIAN by indicating a mixed race but having IHS coverage. Columns (1)-(3) controls for health-related outcomes related to if respondents if they tested positive for COVID-19, report long-COVID symptoms, are fully vaccinated from COVID-19, and if tested for COVID-19 in the past year. Each model controls for respondent demographics of gender, age, and weight status and the PUF models include year fixed effects. Samples restricted to respondents less than 65 years old. Symbols denote significance 0.5% (***), 1% (**), 5% (*), and 10% (+) levels. | | | |
|  |
|  |
|  |
|  |
