# Supplementary material for: The Disproportionate Burden: Health and Economic Outcomes of COVID-19 for Native American Communities
Source: Research Square preprint supplement (doi:10.21203/rs.3.rs-9452333/v1), 2026-05-27
Supplement: Supplementary file 2 [file ef9cd0cf0f3f0e5ab6854b5d.docx]

| **Table 1: Summary Statistics, 2021-2023** | | | | | | | | | | | |
| --- | --- | --- | --- | --- | --- | --- | --- | --- | --- | --- | --- |
|  |  | **Public Use Files (PUF)** | | | | | **Restricted Oversample (RO)** | | | | | |
|  |  | **non-AIAN** | | **AIAN** | | **AIAN** | | | |
|  |  | (1) | | (2) | | (3) | | | |
| **Panel A: Outcome Variables** | | **Mean / S.E.** | **Obs.** | **Mean / S.E.** | **Obs.** | **Mean / S.E.** | | **Obs.** | | |
|  | Positive COVID-19 Test | 0.405 | 52,035 | **0.466***** | 1,618 | **0.457***** | | 725 | | |
|  |  | (0.002) |  | (0.017) |  | (0.032) | |  | | |
|  | Long-COVID | 0.295 | 19,185 | **0.405***** | 672 | **0.425**** | | 351 | | |
|  |  | (0.005) |  | (0.029) |  | (0.042) | |  | | |
|  | Full Vaccination | 0.894 | 41,842 | **0.829***** | 1,292 | **0.800***** | | 769 | | |
|  |  | (0.002) |  | (0.016) |  | (0.023) | |  | | |
|  | Tested for COVID-19 | 0.716 | 44,562 | **0.750*** | 1,354 | **0.766*** | | 943 | | |
|  |  | (0.003) |  | (0.017) |  | (0.025) | |  | | |
|  | Food Insecure w/ Hunger | 0.043 | 65,606 | **0.077***** | 1,981 | **0.103***** | | 943 | | |
|  |  | (0.001) |  | (0.010) |  | (0.016) | |  | | |
|  | Lost Job due to Pandemic | 0.095 | 44,562 | **0.124+** | 1,354 | **0.141*** | | 769 | | |
|  |  | (0.002) |  | (0.014) |  | (0.021) | |  | | |
|  | Reduced Income/Hours due to Pandemic | 0.155 | 44,562 | **0.183+** | 1,354 | **0.209*** | | 769 | | |
|  |  | (0.003) |  | (0.016) |  | (0.026) | |  | | |
| **Panel B: Control Variables** | | **Mean / S.E.** |  | **Mean / S.E.** |  | **Mean / S.E.** | |  | | |
|  | Rural | 0.095 |  | **0.134***** |  | **0.225***** | |  | | |
|  |  | (0.001) |  | (0.012) |  | (0.020) | |  | | |
|  | Demographics |  |  |  |  |  | |  | | |
|  | Male | 0.490 |  | 0.508 |  | 0.483 | |  | | |
|  |  | (0.001) |  | (0.016) |  | (0.028) | |  | | |
|  | Age 30-39 | 0.163 |  | **0.196*** |  | 0.194 | |  | | |
|  |  | (0.0004) |  | (0.013) |  | (0.024) | |  | | |
|  | Age 40-49 | 0.160 |  | 0.154 |  | 0.188 | |  | | |
|  |  | (0.0004) |  | (0.012) |  | (0.022) | |  | | |
|  | Age 50-64 | 0.238 |  | **0.205*** |  | 0.233 | |  | | |
|  |  | (0.0004) |  | (0.013) |  | (0.022) | |  | | |
|  | Aged 65+ | 0.222 |  | **0.143***** |  | **0.141***** | |  | | |
|  |  | (0.0003) |  | (0.009) |  | (0.017) | |  | | |
|  | Married | 0.498 |  | **0.389***** |  | **0.343***** | |  | | |
|  |  | (0.002) |  | (0.017) |  | (0.026) | |  | | |
|  | Lives w/ Partner | 0.092 |  | 0.098 |  | **0.140*** | |  | | |
|  |  | (0.002) |  | (0.009) |  | (0.020) | |  | | |
|  | Widowed/Separated/Divorced | 0.147 |  | 0.149 |  | 0.175 | |  | | |
|  |  | (0.001) |  | (0.010) |  | (0.020) | |  | | |
|  | Weight |  |  |  |  |  | |  | | |
|  | Obese | 0.283 |  | **0.400***** |  | **0.405***** | |  | | |
|  |  | (0.003) |  | (0.017) |  | (0.028) | |  | | |
|  | Socioeconomic Status |  |  |  |  |  | |  | | |
|  | Poor (<200% FPL) | 0.295 |  | **0.454***** |  | **0.456** | |  | | |
|  |  | (0.003) |  | (0.019) |  | (0.028) | |  | | |
|  | Utilization / Access |  |  |  |  |  | |  | | |
|  | Visited ER Past Year | 0.172 |  | **0.207**** |  | **0.240***** | |  | | |
|  |  | (0.002) |  | (0.013) |  | (0.024) | |  | | |
|  | Covered by Medicare | 0.223 |  | **0.167***** |  | **0.170**** | |  | | |
|  |  | (0.001) |  | (0.011) |  | (0.019) | |  | | |
| Source: California Health Interview Survey Public Use Files (2021-2023) and Restricted Oversample (2021/22). | | | | | | | | |  | | | |
| Notes: Column (1) includes respondents not identified as AIAN using PUF data [n=52,035], column (2) includes respondents that are identified as AIAN using PUF data [n=1,618], and column (3) includes respondents that are identified as AIAN using the RO data [n=1,233]. Columns in Panel A report the conditional sample size for the outcome question to the right. Column (2) also indicates statistical differences in means from column (1) and column (2). Column (3) indicates the statistical differences in means from column (1) and column (3). Symbols denote significance 0.5% (***), 1% (**), 5% (*), and 10% (+) levels. Blue shading indicates a significant difference between columns (2) and (3). | | | | | | | | | | | |
|
|
|
|
|

| **Table 2: Positive Testing & Long-COVID** | | | | | | | |
| --- | --- | --- | --- | --- | --- | --- | --- |
| Outcome Variable: | **Positive COVID Test** | | | **Long-COVID** | | | | |
| **Sample:** | **non-AIAN PUF** | **AIAN PUF** | **AIAN RO** | | **non-AIAN PUF** | **AIAN PUF** | **AIAN RO** | | |
|  | (1) | (2) | (3) | | (4) | (5) | (6) | | |
| Rural | -0.005 | -0.081 | -0.043 | | **0.031*** | **0.247***** | 0.104 | | |
|  | (0.009) | (0.052) | (0.069) | | (0.013) | (0.085) | (0.091) | | |
| Obese (BMI>=30) | **0.054***** | 0.058 | 0.049 | | **0.091***** | **0.193***** | **0.158*** | | |
|  | (0.007) | (0.039) | (0.061) | | (0.009) | (0.051) | (0.075) | | |
| Poor (<200% FPL) | -0.002 | 0.018 | **-0.113+** | | **0.138***** | **0.098+** | **0.205**** | | |
|  | (0.007) | (0.038) | (0.062) | | (0.012) | (0.057) | (0.076) | | |
| Visited ER Past Year | **0.042***** | 0.056 | -0.096 | | **0.105***** | -0.026 | 0.098 | | |
|  | (0.008) | (0.049) | (0.069) | | (0.012) | (0.069) | (0.089) | | |
| Covered by Medicare | **-0.157***** | **-0.198***** | **-0.182**** | | **-0.054***** | -0.085 | **-0.188*** | | |
|  | (0.007) | (0.043) | (0.075) | | (0.011) | (0.076) | (0.088) | | |
| Constant | 0.180*** | 0.324*** | 0.677*** | | 0.223*** | 0.260*** | 0.238** | | |
|  | (0.009) | (0.054) | (0.074) | | (0.014) | (0.073) | (0.087) | | |
| Outcome Mean | 0.405 | 0.466 | 0.457 | | 0.295 | 0.405 | 0.425 | | |
| Outcome Standard Deviation | 0.491 | 0.499 | 0.498 | | 0.456 | 0.491 | 0.495 | | |
| r2 | 0.121 | 0.092 | 0.108 | | 0.057 | 0.122 | 0.162 | | |
| N pop | 69,317,228 | 2,363,625 | 704,209 | | 28,232,735 | 1,076,149 | 405,085 | | |
| N | 52,035 | 1,618 | 725 | | 19,185 | 672 | 351 | | |
| Source: California Health Interview Survey (CHIS) Public Use Files (2021-2023) and Restricted Oversample (2021/22). | | | | | | | |
| Notes: Columns (1)-(3) ask respondents if they have tested positive for COVID-19; columns (4)-(6) ask respondents if experienced COVID-19 symptoms lasting two or more months. Columns (1), (2), (4), and (5) are from the CHIS public use fille adult surveys and columns (3) and (6) are from the CHIS restricted oversample survey. Each model controls for respondent demographics of gender, age, and marital status and the PUF models include year fixed effects. Symbols denote significance 0.5% (***), 1% (**), 5% (*), and 10% (+) levels. | | | | | | | |
|  | | |
|  | | |
|  | | |

| **Table 3: Vaccination & Testing for COVID** | | | | | | |
| --- | --- | --- | --- | --- | --- | --- |
| Outcome Variable: | **Full Vaccination** | | | **Test for COVID** | | |
| **Sample:** | **non-AIAN PUF** | **AIAN PUF** | **AIAN RO** | **non-AIAN PUF** | **AIAN PUF** | **AIAN RO** | | |
|  | (1) | (2) | (3) | (4) | (5) | (6) |
| Rural | **-0.082***** | **-0.194***** | **-0.159**** | **-0.034***** | -0.053 | **-0.099+** |
|  | (0.008) | (0.060) | (0.061) | (0.009) | (0.069) | (0.053) |
| Obese (BMI>=30) | -0.007 | **-0.041+** | -0.002 | 0.003 | -0.016 | 0.075 |
|  | (0.005) | (0.023) | (0.047) | (0.007) | (0.043) | (0.049) |
| Poor (<200% FPL) | **-0.089***** | **-0.143***** | -0.054 | **-0.049***** | **-0.098*** | **-0.087+** |
|  | (0.007) | (0.034) | (0.050) | (0.006) | (0.039) | (0.053) |
| Visited ER Past Year | **-0.032***** | 0.022 | 0.014 | **0.121***** | 0.010 | -0.022 |
|  | (0.007) | (0.035) | (0.055) | (0.008) | (0.043) | (0.061) |
| Covered by Medicare | **0.048***** | **0.118***** | **0.126***** | **-0.119***** | -0.067 | -0.032 |
|  | (0.005) | (0.029) | (0.040) | (0.007) | (0.064) | (0.062) |
| Constant | 0.908*** | 0.871*** | 0.799*** | 0.649*** | 0.786*** | 0.848*** |
|  | (0.006) | (0.032) | (0.055) | (0.008) | (0.047) | (0.062) |
| Outcome Mean | 0.894 | 0.829 | 0.800 | 0.716 | 0.750 | 0.766 |
| Outcome Standard Deviation | 0.308 | 0.376 | 0.400 | 0.451 | 0.433 | 0.424 |
| r2 | 0.040 | 0.119 | 0.061 | 0.083 | 0.057 | 0.040 |
| N_pop | 56,805,171 | 1,966,502 | 845,465 | 57,324,569 | 1,885,962 | 919,300 |
| N | 41,842 | 1,292 | 769 | 44,562 | 1,354 | 943 |
| Source: California Health Interview Survey (CHIS) Public Use Files (2021-2023) and Restricted Oversample (2021/22). | | | | | | |
| Notes: Columns (1)-(3) ask respondents if they are fully vaccinated from COVID-19; columns (4)-(6) ask respondents they tested for COVID-19 in the past year. Columns (1), (2), (4), and (5) are from the CHIS public use fille adult surveys and columns (3) and (6) are from the CHIS restricted oversample survey. Each model controls for respondent demographics of gender, age, and marital status and the PUF models include year fixed effects. Symbols denote significance 0.5% (***), 1% (**), 5% (*), and 10% (+) levels. | | | | | | |
|  |
|  |
|  |

| **Table 4: Economic Impact from Pandemic** | | | | | | | | | | |
| --- | --- | --- | --- | --- | --- | --- | --- | --- | --- | --- |
| **Panel A:** |  |  |  |  |  |  |  |  |  | | |
| Outcome Variable: | **Food Insecurity w/ Hunger** | | | | | | | | | |
| **Sample:** | **non-AIAN** | **AIAN** | | **non-AIAN** | **AIAN** | | **non-AIAN** | **AIAN** | | | |
|  | **PUF** | **PUF** | **RO** | **PUF** | **PUF** | **RO** | **PUF** | **PUF** | **RO** | | |
|  | (1) | (2) | (3) | (4) | (5) | (6) | (7) | (8) | (9) | | |
| COVID-19 Vaccination Status | **-0.087***** | **-0.081+** | -0.066 | -- | -- | -- | -- | -- | -- | | |
|  | (0.012) | (0.044) | (0.051) | -- | -- | -- | -- | -- | -- | | |
| COVID-19 Positive Test Results | -- | -- | -- | -0.002 | 0.009 | **-0.114**** | -- | -- | -- | | |
|  | -- | -- | -- | (0.004) | (0.020) | (0.044) | -- | -- | -- | | |
| Self-Report Long-COVID Symptoms | -- | -- | -- | -- | -- | -- | **0.073***** | **0.098*** | **0.094*** | | |
|  | -- | -- | -- | -- | -- | -- | (0.008) | (0.039) | (0.043) | | |
| Outcome Mean | 0.056 | 0.096 | 0.12 | 0.052 | 0.076 | 0.126 | 0.055 | 0.086 | 0.087 | | |
| Outcome Standard Deviation | 0.23 | 0.294 | 0.325 | 0.222 | 0.266 | 0.332 | 0.228 | 0.28 | 0.283 | | |
| r2 | 0.021 | 0.027 | 0.019 | 0.008 | 0.016 | 0.041 | 0.026 | 0.040 | 0.054 | | |
| N_pop | 43,855,893 | 1,679,173 | 722,541 | 54,996,587 | 2,043,922 | 604,567 | 24,090,742 | 970,419 | 377,596 | | |
| N | 28,548 | 1,002 | 572 | 37,063 | 1,290 | 556 | 15,117 | 573 | 302 | | |
| **Panel B:** |  |  |  |  |  |  |  |  |  | | |
| Outcome Variable: | **Job Loss** | | | | | | | | | |
| **Sample:** | **non-AIAN** | **AIAN** | | **non-AIAN** | **AIAN** | | **non-AIAN** | **AIAN** | | | |
|  | **PUF** | **PUF** | **RO** | **PUF** | **PUF** | **RO** | **PUF** | **PUF** | | **RO** | |
|  | (1) | (2) | (3) | (4) | (5) | (6) | (7) | (8) | | (9) | |
| COVID-19 Vaccination Status | **-0.058***** | **-0.092+** | -0.026 | -- | -- | -- | -- | -- | | -- | |
|  | (0.014) | (0.056) | (0.053) | -- | -- | -- | -- | -- | | -- | |
| COVID-19 Positive Test Results | -- | -- | -- | 0.003 | **-0.078*** | **-0.189***** | -- | -- | | -- | |
|  | -- | -- | -- | (0.006) | (0.033) | (0.054) | -- | -- | | -- | |
| Self-Report Long-COVID Symptoms | -- | -- | -- | -- | -- | -- | **0.074***** | 0.037 | | 0.058 | |
|  | -- | -- | -- | -- | -- | -- | (0.014) | (0.047) | | (0.053) | |
| Outcome Mean | 0.105 | 0.113 | 0.157 | 0.113 | 0.152 | 0.168 | 0.115 | 0.075 | | 0.115 | |
| Outcome Standard Deviation | 0.306 | 0.317 | 0.364 | 0.317 | 0.359 | 0.375 | 0.319 | 0.264 | | 0.32 | |
| r2 | 0.007 | 0.018 | 0.016 | 0.005 | 0.024 | 0.091 | 0.018 | 0.04 | | 0.032 | |
| N_pop | 22,136,346 | 870,210 | 722,541 | 33,277,039 | 1,234,959 | 556,636 | 11,156,525 | 483,983 | | 377,596 | |
| N | 14,277 | 507 | 572 | 22,792 | 795 | 464 | 6,583 | 273 | | 302 | |
| **Panel C:** |  |  |  |  |  |  |  |  | |  | |
| Outcome Variable: | **Reduced Income/Hours** | | | | | | | | | |
| **Sample:** | **non-AIAN** | **AIAN** | | **non-AIAN** | **AIAN** | | **non-AIAN** | **AIAN** | | | |
|  | **PUF** | **PUF** | **RO** | **PUF** | **PUF** | **RO** | **PUF** | **PUF** | **RO** | | |
|  | (1) | (2) | (3) | (4) | (5) | (6) | (7) | (8) | (9) | | |
| COVID-19 Vaccination Status | -0.022 | **-0.231**** | -0.082 | -- | -- | -- | -- | -- | -- | | |
|  | (0.014) | (0.080) | (0.074) | -- | -- | -- | -- | -- | -- | | |
| COVID-19 Positive Test Results | -- | -- | -- | -0.0003 | 0.030 | -0.068 | -- | -- | -- | | |
|  | -- | -- | -- | (0.010) | (0.043) | (0.066) | -- | -- | -- | | |
| Self-Report Long-COVID Symptoms | -- | -- | -- | -- | -- | -- | **0.075***** | **-0.136+** | -0.108 | | |
|  | -- | -- | -- | -- | -- | -- | (0.012) | (0.081) | (0.075) | | |
| Outcome Mean | 0.153 | 0.225 | 0.231 | 0.186 | 0.204 | 0.239 | 0.15 | 0.224 | 0.198 | | |
| Outcome Standard Deviation | 0.36 | 0.418 | 0.422 | 0.389 | 0.403 | 0.427 | 0.358 | 0.418 | 0.399 | | |
| r2 | 0 | 0.061 | 0.009 | 0.008 | 0.024 | 0.024 | 0.011 | 0.039 | 0.047 | | |
| N_pop | 22,136,346 | 870,210 | 722,541 | 33,277,039 | 1,234,959 | 556,636 | 11,156,525 | 483,983 | 377,596 | | |
| N | 14,277 | 507 | 572 | 22,792 | 795 | 464 | 6,583 | 273 | 302 | | |
| Source: California Health Interview Survey (CHIS) Public Use Files (2021-2023) and Restricted Oversample (2021/22). | | | | | | | | | | |
| Notes: Columns (1)-(3) controls for vaccination status of respondent; columns (4)-(6) controls for testing positive for COVID-19; and columns (7)-(9) controls for if the respondent self-reported long-COVID symptoms (conditional on having COVID-19). Columns (1), (2), (4), (5), (7), and (8) are from the CHIS public use fille adult surveys and columns (3), (6), and (9) are from the CHIS restricted oversample survey. Each model controls for respondent demographics of gender, age, and weight status and the PUF models include year fixed effects. Samples restricted to respondents less than 65 years old. Symbols denote significance 0.5% (***), 1% (**), 5% (*), and 10% (+) levels. | | | | | | | | | | |
|  |
|  |
|  |
